# Supplementary material for: In-Silico Analysis and Antidiabetic Effect of α-Amylase and α-Glucosidase Inhibitory Peptides from Lupin Protein Hydrolysate: Enzyme-Peptide Interaction Study Using Molecular Docking Approach
Source: MDPI journal article supplement (doi:10.3390/foods11213375), 2022-10-26
Supplement: s1 [file s1]

Supplementary Table S1: Degree of hydrolysis and protein content of lupin protein isolate (LPI) and its hydrolysate

|            | Degree of hydrolysis (%) | Protein content (%) |
|------------|--------------------------|---------------------|
| <b>LPI</b> | -                        | 92.10±0.70          |
| <b>ACT</b> | 41.28±0.94               | 83.07±0.13          |
| <b>FCT</b> | 45.47±0.63               | 81.24±1.58          |

ACT: Alcalase hydrolysate; FCT: Flavourzyme hydrolysate

## Supplementary Table S2

List of  $\alpha$ -amylase and  $\alpha$ -glucosidase inhibitory peptides identified in lupin protein hydrolysate and prepared using alcalase (ACT)

| Peptide             | Peptide Ranker |
|---------------------|----------------|
| FP                  | 0.993916       |
| RW                  | 0.978386       |
| SPRRF               | 0.919692       |
| PMLL                | 0.89733        |
| ML                  | 0.894564       |
| AIPINNPGKL          | 0.807084       |
| MLLL                | 0.756994       |
| AIPPGIPY            | 0.753808       |
| HSDADFIL            | 0.683272       |
| RLL                 | 0.607206       |
| FE                  | 0.589707       |
| LR                  | 0.569984       |
| RR                  | 0.565498       |
| LRL                 | 0.564172       |
| SVPGCT              | 0.501911       |
| LLPH                | 0.501446       |
| QGAGG               | 0.408522       |
| TLPILR              | 0.398038       |
| ILNPDDNQNL          | 0.392508       |
| REGDIIAIPPGIPY      | 0.389645       |
| CAGV                | 0.373811       |
| QGNSVFN             | 0.373698       |
| AFNVDEEIIINRL       | 0.345798       |
| IAFKT               | 0.313618       |
| YIAGN               | 0.269281       |
| LLGV                | 0.246104       |
| LTLPI               | 0.245968       |
| IISPK               | 0.233237       |
| LDTTSLNQLDPSPRRFYIA | 0.198992       |

|            |           |
|------------|-----------|
| RGQPE      | 0.196585  |
| YD         | 0.186864  |
| NSNRPE     | 0.17961   |
| VR         | 0.14691   |
| NALEPDNRVE | 0.125121  |
| VR         | 0.114691  |
| LAATS      | 0.0814739 |
| EDNVI      | 0.0656674 |
| EETICTA    | 0.0628415 |
| VK         | 0.03329   |

### Supplementary Table S3

List of  $\alpha$ -amylase and  $\alpha$ -glucosidase inhibitory peptides identified in lupin protein hydrolysate and prepared using alcalase (FCT)

| Peptide                    | Peptide Ranker |
|----------------------------|----------------|
| FP                         | 0.99392        |
| ML                         | 0.89456        |
| PPGIP                      | 0.83822        |
| TF                         | 0.82668        |
| AIPINNPGKL                 | 0.80708        |
| LP                         | 0.79612        |
| RPR                        | 0.72263        |
| LRP                        | 0.72229        |
| VGNAALPPGLPR               | 0.69474        |
| FE                         | 0.58971        |
| RPH                        | 0.58268        |
| YL                         | 0.57536        |
| LR                         | 0.56998        |
| EGDIIAIPPGIP               | 0.56836        |
| RR                         | 0.5655         |
| CVVLLALPPVAPR              | 0.53394        |
| EGDIIAIPPGIPY              | 0.52435        |
| NVLSGFDPQF                 | 0.51439        |
| GCFAST                     | 0.49805        |
| DP                         | 0.49056        |
| SGNQGP                     | 0.46846        |
| QFLTQAFNVDEEIIINRLQNPDERLK | 0.43555        |
| REGDIIAIPPGIP              | 0.4322         |
| AR                         | 0.39458        |
| REGDIIAIPPGIPY             | 0.38965        |
| IIRVEEGLGVISPKW            | 0.3876         |
| CAGV                       | 0.37381        |
| VAHAFN                     | 0.33398        |
| HR                         | 0.33151        |

|                                   |         |
|-----------------------------------|---------|
| NILSGFDPQFLSQALNIDE               | 0.30077 |
| FPGSIEDVER                        | 0.29937 |
| EPKGL                             | 0.29619 |
| QR                                | 0.27442 |
| QVFRGIPAEVLA                      | 0.22197 |
| HH                                | 0.21622 |
| AEHGSIYKN                         | 0.21496 |
| KR                                | 0.21307 |
| NVLSGFDPQFLTQAFNVDEEIINRLQNPDERLK | 0.19595 |
| EPDNR                             | 0.19543 |
| QQQGA                             | 0.19281 |
| IIRVEEGLGVISPK                    | 0.17558 |
| LK                                | 0.17004 |
| DEFLEEAFSVDR                      | 0.16995 |
| KHR                               | 0.16821 |
| AGVALS                            | 0.15853 |
| QFLSQALNIDE                       | 0.1539  |
| DH                                | 0.14798 |
| RRKK                              | 0.14223 |
| QVVDC                             | 0.13374 |
| REGDIIAVPT                        | 0.12965 |
| EIINRLQNPDERLK                    | 0.12656 |
| GQEQSHQDEGVIV                     | 0.12566 |
| VDEEIINR                          | 0.12189 |
| LAAEHGSI                          | 0.11983 |
| EQSHQDEGVIV                       | 0.11202 |
| KH                                | 0.11036 |
| AK                                | 0.09791 |
| NDQATT                            | 0.09133 |
| ISTAN                             | 0.09133 |
| TTSP                              | 0.08736 |
| YEEL                              | 0.0765  |
| SK                                | 0.07327 |
| EGLKVIS                           | 0.07159 |
| TLIDTT                            | 0.06028 |

|       |         |
|-------|---------|
| TSTRV | 0.05843 |
| VEGEA | 0.05727 |
| DT    | 0.05156 |
| VK    | 0.03329 |
